# Supplementary material for: Genome-wide analysis reveals no evidence of trans chromosomal regulation of mammalian immune development
Source: PubMed Central journal article supplement (PMC6010296; doi:10.1371/journal.pgen.1007431), 2018-06-08
Supplement: pgen.1007431.s006.pdf [file pgen.1007431.s006.pdf]

**Supplemental Table 3: Antibodies used in study**

| Target            | Species | Clone    | Source      |
|-------------------|---------|----------|-------------|
| TCR $\beta$       | Mouse   | H57-597  | BD          |
| CD19              | Mouse   | ID3      | BD          |
| B220              | Mouse   | RA3-6B2  | BD          |
| IgM               | Mouse   | R6-60.2  | BD          |
| IgD               | Mouse   | IA6-2    | BD          |
| CD4               | Mouse   | GK1.5-7  | In house    |
| CD8               | Mouse   | 53-6.7   | eBioscience |
| CD62L             | Mouse   | MEL-14   | In house    |
| CD44              | Mouse   | IM7      | Biolegend   |
| Ly6G              | Mouse   | 1A8      | BD          |
| Ly6C              | Mouse   | AL-21    | BD          |
| FIt3R             | Mouse   | A2F10    | BD          |
| CD138             | Mouse   | 281-2    | Biolegend   |
| CD22              | Mouse   | 12a/CD22 | BD          |
| $\alpha\beta$ TCR | Human   | IP26     | eBioscience |
| CD4               | Human   | RPA-T4   | BD          |
| CD45RA            | Human   | 5H9      | BD          |
| CD25              | Human   | M-A251   | BD          |
| CD14              | Human   | 63D3     | Biolegend   |
| CD16              | Human   | 3G8      | BD          |
| HLA-DR            | Human   | L243     | eBioscience |
| CD19              | Human   | HIB19    | Biolegend   |
